# Supplementary material for: Heat Shock Alters Mesenchymal Stem Cell Identity and Induces Premature Senescence
Source: Front Cell Dev Biol. 2020 Sep 22;8:565970. doi: 10.3389/fcell.2020.565970 (PMC7537765; doi:10.3389/fcell.2020.565970)
Supplement: Supplementary Table 3 — List of first and secondary antibodies used in this study. [file Table_3.xlsx]

## Sheet: Sheet1
Antibody	Species	Dilution	Company (Catalog)
BrdU	Mouse	1:5	Santa Cruz (sc-20045)
BrdU	Rat	1:100	Abcam (ab6326)
CD86	Rat	1:100	Abcam (ab119857)
CD163	Rabbit	1:60	Abcam (ab182422)
Anti-phospho-histone H2A.X	Mouse	1:300	Millipore (05-636)
CD44	Rabbit	1:50	Abcam (ab157107)
CD73	Mouse	1:50	Abcam (ab202122)
CD90	Mouse	1:1000	Abcam (ab212885)
Vimentin	Goat	1:100	Santa Cruz (sc-7557)
Alexa Fluor® 488 anti-mouse CD54/ICAM1	Rat	1:100	BioLegend (116111)
Alexa Fluor® 488 anti-rabbit	Goat	1:1000	ThermoFisher (A11070)
Fluorescein anti-mouse	Goat	1:1000	ThermoFisher (F2761)
Fluorescein anti-rat	Sheep	1:1000	ThermoFisher (PA1-28638)
Fluorescein anti-goat	Chicken	1:1000	ThermoFisher (A15964)
Alexa Fluor® 488 anti-rat	Goat	1:1000	Abcam (ab150165)
